# Supplementary material for: Effect of tai chi versus aerobic exercise for fibromyalgia: comparative effectiveness randomized controlled trial
Source: PubMed Central journal article supplement — BMJ. 2018 Mar 21;360:k851. doi: 10.1136/bmj.k851 (PMC5861462; doi:10.1136/bmj.k851), 2018-03-21
Supplement: wanc040953.wt1.pdf [file wanc040953.wt1.pdf]

**Appendix Table 1. Intervention Attendance**

|                                               | Tai Chi<br>(N=151)   |                      |                      |                      | Aerobic Exercise<br>(N = 75) | Total<br>(N=226) |
|-----------------------------------------------|----------------------|----------------------|----------------------|----------------------|------------------------------|------------------|
|                                               | 1x12 weeks<br>(N=39) | 2x12 weeks<br>(N=37) | 1x24 weeks<br>(N=39) | 2x24 weeks<br>(N=36) | 2x24 weeks<br>(N=75)         |                  |
| Attendance Rate, Mean (SD)*                   | 66.7 (28.7)          | 65.1 (26.0)          | 57.2 (27.9)          | 57.8 (33.3)          | 40.2 (29.9)                  | 54.9 (30.9)      |
| Participants by Attendance Rate, <i>n</i> (%) |                      |                      |                      |                      |                              |                  |
| 70% - 100%                                    | 21 (53.9)            | 21 (56.8)            | 16 (41.0)            | 17 (47.2)            | 13 (17.3)                    | 88 (38.9)        |
| 50% - 69%                                     | 7 (18.0)             | 3 (8.1)              | 10 (25.6)            | 6 (16.7)             | 12 (16.0)                    | 38 (16.8)        |
| 1% - 49%                                      | 9 (23.1)             | 11 (29.7)            | 11 (28.2)            | 11 (30.6)            | 41 (54.7)                    | 83 (36.7)        |
| 0%                                            | 2 (5.1)              | 2 (5.4)              | 2 (5.1)              | 2 (5.6)              | 9 (12.0)                     | 17 (7.5)         |

\*Treated participants only.

**Appendix Table 2: Baseline Characteristics Associated with Missingness at Follow-Up Evaluation Visits \***

| Baseline characteristic                                       | Week 12              |                      | Week 24             |                      | Week 52             |                      |
|---------------------------------------------------------------|----------------------|----------------------|---------------------|----------------------|---------------------|----------------------|
|                                                               | Missing Data (n= 43) | Data Present (n=183) | Missing Data (n=45) | Data Present (n=181) | Missing Data (n=68) | Data Present (n=158) |
| Mean age (SD), y                                              | <b>46.5 (13.0)</b>   | <b>52.9 (11.6)</b>   | 49.3 (12.7)         | 52.3 (12.0)          | <b>49.1 (13.2)</b>  | <b>52.8 (11.5)</b>   |
| Female, n (%)                                                 | 41 (95.4)            | 168 (91.8)           | 43 (95.6)           | 166 (91.7)           | 63 (92.7)           | 146 (92.4)           |
| Race, n (%)                                                   |                      |                      |                     |                      |                     |                      |
| White                                                         | 27 (62.8)            | 111 (60.7)           | 28 (62.2)           | 110 (60.8)           | 45 (66.2)           | 93 (58.9)            |
| Black                                                         | 11 (25.6)            | 40 (21.9)            | 12 (26.7)           | 39 (21.5)            | 17 (25.0)           | 34 (21.5)            |
| Other                                                         | 5 (11.6)             | 32 (17.5)            | 5 (11.1)            | 32 (17.7)            | 6 (8.8)             | 31 (19.6)            |
| High-school or higher education, n (%)                        | 40 (95.2)            | 175 (95.6)           | 43 (95.6)           | 172 (95.6)           | 64 (94.1)           | 151 (96.2)           |
| Live alone, n (%)                                             | 15 (35.7)            | 92 (50.3)            | 20 (44.4)           | 87 (48.3)            | 33 (48.5)           | 74 (47.1)            |
| Mean duration of body pain (SD), y                            | <b>8.2 (5.7)</b>     | <b>12.9 (10.0)</b>   | 10.2 (11.0)         | 12.4 (9.1)           | <b>10.0 (10.4)</b>  | <b>12.9 (9.0)</b>    |
| Mean body-mass index (SD), kg/m <sup>2</sup>                  | 28.4 (6.4)           | 30.4 (6.7)           | 29.6 (6.6)          | 30.1 (6.8)           | 29.1 (6.8)          | 30.5 (6.7)           |
| Medications, n (%)                                            |                      |                      |                     |                      |                     |                      |
| Paracetamol                                                   | 26 (61.9)            | 121 (66.1)           | 26 (57.8)           | 121 (67.2)           | 45 (66.2)           | 102 (65.0)           |
| NSAIDS                                                        | 34 (81.0)            | 158 (86.3)           | 38 (84.4)           | 154 (85.6)           | 56 (82.4)           | 136 (86.6)           |
| Narcotics                                                     | 22 (52.4)            | 93 (51.1)            | 20 (45.5)           | 95 (52.8)            | 40 (59.7)           | 75 (47.8)            |
| Antidepressants                                               | 29 (69.1)            | 103 (56.6)           | 28 (62.2)           | 104 (58.1)           | 46 (67.7)           | 86 (55.1)            |
| Anticonvulsants                                               | 17 (40.5)            | 51 (27.9)            | 17 (37.8)           | 51 (28.3)            | 21 (30.9)           | 47 (29.9)            |
| Muscle relaxers                                               | 16 (38.1)            | 45 (24.6)            | 11 (24.4)           | 50 (27.8)            | 20 (29.4)           | 41 (26.1)            |
| Benzodiazepines                                               | 17 (40.5)            | 54 (29.5)            | 14 (31.1)           | 57 (31.7)            | 27 (39.7)           | 44 (28.0)            |
| Self-reported comorbidities, n (%)                            |                      |                      |                     |                      |                     |                      |
| Heart condition                                               | 3 (7.1)              | 18 (9.8)             | 4 (8.9)             | 17 (9.4)             | 3 (4.4)             | 18 (11.5)            |
| Hypertension                                                  | 12 (28.6)            | 56 (30.6)            | 11 (24.4)           | 57 (31.7)            | 17 (25.0)           | 51 (32.5)            |
| Diabetes                                                      | 5 (11.9)             | 13 (7.1)             | 3 (6.7)             | 15 (8.3)             | 4 (5.9)             | 14 (8.9)             |
| Treatment Assignment                                          |                      |                      |                     |                      |                     |                      |
| Aerobic exercise                                              | 17 (39.5)            | 58 (31.7)            | 18 (40.0)           | 57 (31.5)            | 22 (32.4)           | 53 (33.5)            |
| Tai Chi 1 x 12 weeks                                          | 10 (23.3)            | 29 (15.9)            | 11 (24.4)           | 28 (15.5)            | 14 (20.6)           | 25 (15.8)            |
| Tai Chi 1 x 24 weeks                                          | 3 (7.0)              | 36 (19.7)            | 5 (11.1)            | 34 (18.8)            | 10 (14.7)           | 29 (18.4)            |
| Tai Chi 2 x 12 weeks                                          | 6 (14.0)             | 31 (16.9)            | 7 (15.6)            | 30 (16.6)            | 11 (16.2)           | 26 (16.5)            |
| Tai Chi 2 x 24 weeks                                          | 7 (16.3)             | 29 (15.9)            | 4 (8.9)             | 32 (17.7)            | 11 (16.2)           | 25 (15.8)            |
| Mean FIQR score (SD) (range, 0-100)†                          | <b>63.0 (18.5)</b>   | <b>54.7 (19.4)</b>   | 59.2 (17.0)         | 55.5 (20.0)          | 57.3 (16.6)         | 55.7 (20.6)          |
| Mean Patient's Global Assessment score (SD) (range, 0-10),cm† | 6.4 (1.7)            | 6.0 (1.9)            | 6.3 (1.6)           | 6.0 (2.0)            | 6.1 (1.5)           | 6.0 (2.1)            |
| Mean HADS scores (SD) (subscale range, 0-21)†                 |                      |                      |                     |                      |                     |                      |
| Depression                                                    | 7.9 (4.2)            | 7.5 (4.1)            | 7.8 (3.8)           | 7.6 (4.2)            | 7.8 (3.5)           | 7.5 (4.4)            |
| Anxiety                                                       | <b>10.2 (4.7)</b>    | <b>8.7 (4.0)</b>     | 9.8 (4.4)           | 8.7 (4.1)            | 9.6 (4.5)           | 8.7 (4.0)            |
| Mean Arthritis Self-Efficacy Scale score (SD) (range, 1-10)‡  | <b>4.3 (1.9)</b>     | <b>5.3 (2.1)</b>     | 4.8 (2.1)           | 5.2 (2.1)            | 5.0 (2.0)           | 5.2 (2.2)            |
| Mean Pittsburgh Sleep Quality Index score (SD) (range, 0-21)† | 12.8 (4.5)           | 11.7 (4.1)           | <b>13.0 (4.1)</b>   | <b>11.6 (4.1)</b>    | 12.3 (4.0)          | 11.7 (4.2)           |
| Mean SF-36 scores (SD) (range, 0-100)‡                        |                      |                      |                     |                      |                     |                      |
| Mental component                                              | 37.2 (11.3)          | 40.7 (10.7)          | 37.9 (12.4)         | 40.6 (10.5)          | <b>37.4 (10.4)</b>  | <b>41.2 (11.0)</b>   |
| Physical component                                            | 30.3 (7.3)           | 30.5 (7.8)           | 31.0 (7.7)          | 30.4 (7.7)           | 31.7 (7.9)          | 30.0 (7.6)           |
| Mean 6-min walk test score (SD), m                            | 418.7 (83.5)         | 394.5 (82.9)         | <b>422.5 (83.2)</b> | <b>393.5 (82.7)</b>  | 412.5 (86.4)        | 393.3 (81.7)         |

NSAID = Nonsteroidal anti-inflammatory drugs; FIQR = Revised Fibromyalgia Impact Questionnaire; HADS = Hospital Anxiety and Depression Scale; SF-36 = 36-Item Short Form Health Survey.

\* Boldface indicates statistically significant differences between groups.

† Higher scores reflect more severe symptoms.

‡ Higher scores indicate better status.

**Appendix Table 3: Mean Change from Baseline for Sensitivity Analyses\***

| Variable                                                                                                                                                                                                                                                                            | Tai Chi<br>1x12 weeks<br>(N = 39) | Tai Chi<br>2x12 weeks<br>(N = 37) | Tai Chi<br>1x24 weeks<br>(N = 39) | Tai Chi<br>2x24 weeks<br>(N = 36) | Aerobic Exercise<br>2x24 weeks<br>(N = 75) |
|-------------------------------------------------------------------------------------------------------------------------------------------------------------------------------------------------------------------------------------------------------------------------------------|-----------------------------------|-----------------------------------|-----------------------------------|-----------------------------------|--------------------------------------------|
| Main results from Table 2 for comparison                                                                                                                                                                                                                                            |                                   |                                   |                                   |                                   |                                            |
| Week 12                                                                                                                                                                                                                                                                             | -16.5 (-23.4, -9.6)               | -12.3 (-19.0, -5.6)               | -6.6 (-12.8, -0.3)                | -17.2 (-24.0, -10.3)              | -6.2 (-11.0, -1.4)                         |
| Week 24                                                                                                                                                                                                                                                                             | -11.4 (-18.7, -4.1)               | -11.4 (-18.4, -4.4)               | -16.7 (-23.4, -10.1)              | -25.4 (-32.3, -18.4)              | -9.2 (-14.3, -4.1)                         |
| Week 52                                                                                                                                                                                                                                                                             | -14.3 (-21.7, -7.0)               | -10.2 (-17.3, -3.1)               | -13.6 (-20.4, -6.8)               | -22.7 (-30.0, -15.4)              | -11.7 (-16.7, -6.6)                        |
| Adjusted for baseline age, duration of body pain, HADS Anxiety score (subscale range, 0-21)†, Arthritis Self-Efficacy Scale score (range, 1-10)‡, Pittsburgh Sleep Quality Index score (range, 0-21)†, SF-36 Mental Component score‡, 6-minute walk test score, and attendance rate |                                   |                                   |                                   |                                   |                                            |
| Week 12                                                                                                                                                                                                                                                                             | -14.4 (-21.6, -7.1)               | -11.3 (-18.4, -4.2)               | -6.2 (-12.9, 0.4)                 | -16.5 (-23.8, -9.1)               | -7.5 (-12.6, -2.3)                         |
| Week 24                                                                                                                                                                                                                                                                             | -11.7 (-19.1, -4.3)               | -10.3 (-17.6, -3.0)               | -16.2 (-23.3, -9.2)               | -24.4 (-31.7, -17.0)              | -9.9 (-15.3, -4.5)                         |
| Week 52                                                                                                                                                                                                                                                                             | -13.6 (-21.2, -6.0)               | -10.8 (-18.2, -3.4)               | -12.8 (-19.9, -5.6)               | -22.2 (-29.6, -14.8)              | -12.0 (-17.3, -6.7)                        |
| Multiple Imputation                                                                                                                                                                                                                                                                 |                                   |                                   |                                   |                                   |                                            |
| Week 12                                                                                                                                                                                                                                                                             | -14.6 (-21.6, -7.6)               | -11.3 (-18.3, -4.3)               | -6.5 (-13.1, 0)                   | -16.4 (-23.6, -9.2)               | -7.5 (-12.5, -2.5)                         |
| Week 24                                                                                                                                                                                                                                                                             | -12.2 (-19.4, -5.1)               | -10.6 (-17.9, -3.4)               | -15.7 (-22.6, -8.9)               | -24.3 (-31.5, -17.2)              | -10.1 (-15.3, -4.9)                        |
| Week 52                                                                                                                                                                                                                                                                             | -14.1 (-21.5, -6.7)               | -11.8 (-19.1, -4.5)               | -13.6 (-20.6, -6.6)               | -21.8 (-29.1, -14.5)              | -12.4 (-17.6, -7.3)                        |

FIQR = Revised Fibromyalgia Impact Questionnaire; HADS = Hospital Anxiety and Depression Scale; SF-36 = 36-Item Short Form Health Survey.

\* All values are estimated means, with 95% confidence intervals.

† Higher scores reflect more severe symptoms.

‡ Higher scores indicate better status.

**Appendix Table 4: Sensitivity Analyses for Between Group Differences in Primary Outcome (FIQR)\***

| Variable                                                                                                                                                                                                                                                                             | Aerobic Exercise vs<br>Tai Chi Groups Combined |             | Tai Chi<br>12-week vs 24-week |               | Tai Chi<br>1x/week vs 2x/week |         | Aerobic Exercise 2x24<br>week vs Tai Chi 2x24 week |                   |
|--------------------------------------------------------------------------------------------------------------------------------------------------------------------------------------------------------------------------------------------------------------------------------------|------------------------------------------------|-------------|-------------------------------|---------------|-------------------------------|---------|----------------------------------------------------|-------------------|
|                                                                                                                                                                                                                                                                                      | Mean (95% CI)                                  | P-value     | Mean (95% CI)                 | P-value       | Mean (95% CI)                 | P-value | Mean (95% CI)                                      | P-value           |
| Main results from Table 2 for comparison                                                                                                                                                                                                                                             |                                                |             |                               |               |                               |         |                                                    |                   |
| Week 12                                                                                                                                                                                                                                                                              | 5.4 (0.6, 10.1)                                | <b>0.03</b> | -2.7 (-9.4, 4.1)              | 0.44          | 3.4 (-3.3, 10.1)              | 0.32    | 10.9 (3.4, 18.5)                                   | <b>0.005</b>      |
| Week 24                                                                                                                                                                                                                                                                              | 5.5 (0.6, 10.4)                                | <b>0.03</b> | 9.6 (2.6, 16.6)               | <b>0.007</b>  | 4.5 (-2.5, 11.4)              | 0.21    | 16.2 (8.7, 23.6)                                   | <b>&lt;0.0001</b> |
| Week 52                                                                                                                                                                                                                                                                              | 2.7 (-2.3, 7.7)                                | 0.29        | 5.8 (-1.4, 13.0)              | 0.11          | 2.7 (-4.5, 9.9)               | 0.46    | 11.1 (2.7, 19.6)                                   | <b>0.01</b>       |
| Adjusted for baseline age, duration of body pain, HADS Anxiety score (subscale range, 0-21)†, Arthritis Self-Efficacy Scale score (range, 1-10)‡, Pittsburgh Sleep Quality Index score (range, 0-21) †, SF-36 Mental Component score‡, 6-minute walk test score, and attendance rate |                                                |             |                               |               |                               |         |                                                    |                   |
| Week 12                                                                                                                                                                                                                                                                              | 5.3 (0.4, 10.2)                                | <b>0.03</b> | -2.9 (-9.9, 4.0)              | 0.40          | 3.7 (-3.3, 10.6)              | 0.30    | 5.7 (-1.7, 13.1)                                   | 0.13              |
| Week 24                                                                                                                                                                                                                                                                              | 5.4 (0.3, 10.4)                                | <b>0.04</b> | 10.5 (3.3, 17.7)              | <b>0.005</b>  | 4.3 (-2.9, 11.5)              | 0.24    | 11.0 (4.3, 17.6)                                   | <b>0.002</b>      |
| Week 52                                                                                                                                                                                                                                                                              | 2.0 (-3.0, 7.1)                                | 0.43        | 6.3 (-1.1, 13.6)              | 0.09          | 3.4 (-3.9, 10.7)              | 0.36    | 3.4 (-4.7, 11.5)                                   | 0.40              |
| Multiple Imputation                                                                                                                                                                                                                                                                  |                                                |             |                               |               |                               |         |                                                    |                   |
| Week 12                                                                                                                                                                                                                                                                              | 3.7 (-1.1, 8.5)                                | 0.13        | -1.7 (-8.7, 5.3)              | 0.63          | 3.2 (-3.7, 10.2)              | 0.36    | 8.8 (0.7, 17.1)                                    | <b>0.03</b>       |
| Week 24                                                                                                                                                                                                                                                                              | 4.5 (-0.6, 9.5)                                | 0.08        | 8.4 (1.2, 15.7)               | <b>0.02</b>   | 3.5 (-3.6, 10.6)              | 0.34    | 14.3 (6.2, 22.2)                                   | <b>0.0005</b>     |
| Week 52                                                                                                                                                                                                                                                                              | 2.3 (-2.7, 7.3)                                | 0.36        | 4.6 (-2.7, 11.8)              | 0.22          | 2.9 (-4.3, 10.1)              | 0.43    | 9.4 (0.8, 18.0)                                    | <b>0.03</b>       |
| Subgroup analysis of participants with ≥50% attendance                                                                                                                                                                                                                               |                                                |             |                               |               |                               |         |                                                    |                   |
| Week 12                                                                                                                                                                                                                                                                              | 5.1 (-1.5, 11.8)                               | 0.13        | -3.6 (-11.1, 3.8)             | 0.34          | 6.3 (-1.6, 13.8)              | 0.10    | 9.9 (-0.2, 19.9)                                   | 0.055             |
| Week 24                                                                                                                                                                                                                                                                              | 6.4 (-0.6, 13.4)                               | 0.07        | 13.8 (6.0, 21.6)              | <b>0.0007</b> | 3.1 (-4.8, 10.9)              | 0.44    | 18.0 (8.7, 27.5)                                   | <b>0.0004</b>     |
| Week 52                                                                                                                                                                                                                                                                              | 1.6 (-5.6, 8.7)                                | 0.67        | 8.5 (0.3, 16.7)               | <b>0.04</b>   | 0.93 (-7.3, 9.1)              | 0.82    | 10.1 (-0.9, 21.1)                                  | 0.07              |

FIQR = Revised Fibromyalgia Impact Questionnaire, (range, 0-100) †; HADS = Hospital Anxiety and Depression Scale; SF-36 = 36-Item Short Form Health Survey. P values were calculated with repeated measures analysis.

\* All values are estimated means, with 95% confidence intervals. Positive scores indicate improved outcome in second listed group. Boldface indicates statistically significant differences between groups. All variables in Table 1 were included in the multiple imputation.

† Higher scores reflect more severe symptoms.

‡ Higher scores indicate better status.

**Appendix Table 5: Adverse Events Summary (Revised with Rates Included\*)**

|                                 | <b>Adverse Event</b> | <b>Rate</b>     | <b>Serious Adverse Event (Rate)</b> | <b>Unanticipated Problem</b> |
|---------------------------------|----------------------|-----------------|-------------------------------------|------------------------------|
| <b>Tai Chi (Total)</b>          | 117                  | 117/151 = 77.5% | 7 (4.6%)                            | 0                            |
| Related                         | 8                    | 8/151 = 5.3%    | 0                                   | 0                            |
| Unrelated                       | 109                  | 109/151 = 72.2% | 7 (4.6%)                            | 0                            |
| Mild                            | 71                   | 71/151 = 47.0%  | -                                   | 0                            |
| Moderate                        | 39                   | 39/151 = 25.8%  | -                                   | 0                            |
| Severe                          | 7                    | 7/151 = 4.6%    | 7 (4.6%)                            | 0                            |
| <b>Aerobic Exercise (Total)</b> | 37                   | 37/75 = 49.3%   | 5                                   | 0                            |
| Related                         | 4                    | 4/75 = 5.3%     | 0                                   | 0                            |
| Unrelated                       | 33                   | 33/75 = 44.0%   | 5 (6.8%)                            | 0                            |
| Mild                            | 18                   | 18/75 = 24.0%   | 0                                   | 0                            |
| Moderate                        | 16                   | 16/75 = 21.3%   | 0                                   | 0                            |
| Severe                          | 3                    | 3/75 = 4.01%    | 5 (6.8%)                            | 0                            |
| <b>Total</b>                    | 154                  | 154/226 = 68.1% | 12 (5.3%)                           | 0                            |

\*Adverse events designated as “Not Related,” “Remote,” and “Possible” were categorized in this table as “Unrelated”; those designated as “Probable” and “Highly Probably” were categorized as “Related.”

**Appendix Table 6: Data on Analgesic Drugs**

| Analgesic drugs | Weeks | Aerobic Exercise vs. Tai Chi groups combined |         | Tai Chi: 12-week vs. 24-week |         | Tai Chi: 1x/week vs. 2x/week |         |
|-----------------|-------|----------------------------------------------|---------|------------------------------|---------|------------------------------|---------|
|                 |       | OR (95% CI)                                  | P-value | OR (95% CI)                  | P-value | OR (95% CI)                  | P-value |
| Paracetamol     | 12    | 1.33 (0.48, 3.67)                            | 0.58    | 1.64 (0.41, 6.67)            | 0.49    | 0.96 (0.24, 3.88)            | 0.95    |
|                 | 24    | 1.93 (0.69, 5.43)                            | 0.21    | 1.86 (0.44, 7.88)            | 0.40    | 0.93 (0.22, 3.96)            | 0.93    |
|                 | 52    | 2.07 (0.72, 5.99)                            | 0.18    | 0.77 (0.17, 3.53)            | 0.73    | 3.10 (0.67, 14.33)           | 0.15    |
| Narcotics       | 12    | 0.99 (0.32, 3.03)                            | 0.99    | 1.63 (0.36, 7.26)            | 0.52    | 2.03 (0.45, 9.06)            | 0.36    |
|                 | 24    | 0.89 (0.28, 2.80)                            | 0.84    | 0.75 (0.16, 3.46)            | 0.72    | 2.59 (0.56, 11.94)           | 0.22    |
|                 | 52    | 1.08 (0.33, 3.51)                            | 0.90    | 1.81 (0.34, 9.63)            | 0.49    | 0.94 (0.18, 5.01)            | 0.95    |
| NSAIDs          | 12    | 0.34 (0.05, 2.45)                            | 0.29    | 1.43 (0.13, 16.15)           | 0.77    | 1.54 (0.15, 15.69)           | 0.72    |
|                 | 24    | 0.56 (0.08, 3.80)                            | 0.56    | 0.23 (0.02, 2.69)            | 0.24    | 1.79 (0.17, 18.47)           | 0.63    |
|                 | 52    | 0.73 (0.10, 5.12)                            | 0.75    | 0.19 (0.01, 2.64)            | 0.22    | 2.47 (0.2, 30.86)            | 0.48    |

NSAIDs = Nonsteroidal anti-inflammatory drugs; OR = Odds ratio.
